# Supplementary material
Source: PubMed Central journal article supplement (PMC3121515)
Supplement: supp_M111.230151_jbc.M111.230151-1.pdf [file supp_M111.230151_jbc.M111.230151-1.pdf]

## Supporting Information Table 1

|                                                                             |    |           |
|-----------------------------------------------------------------------------|----|-----------|
| <b>HLA-A*02:01<br/>(and T134K)</b><br><br><b>All Peptides<br/>SYFPEITHI</b> | 1  | YLEPGPVTA |
|                                                                             | 2  | YLNKIQNSL |
|                                                                             | 3  | ALSNLEVKL |
|                                                                             | 4  | KVAELVHFL |
|                                                                             | 5  | TLNAWVKVV |
|                                                                             | 6  | SLSRFSWGA |
|                                                                             | 7  | FLWGPRAYA |
|                                                                             | 8  | ALFDGDPHL |
|                                                                             | 9  | HLIDYLVTS |
|                                                                             | 10 | VLVKSPNHV |
|                                                                             | 11 | ILDKKVEKV |
|                                                                             | 12 | HLGNVKYLV |
|                                                                             | 13 | GLHCYEQLV |
|                                                                             | 14 | GLYDGMEHL |
|                                                                             | 15 | RLMKQDFSV |
|                                                                             | 16 | YMNGTMSQV |
|                                                                             | 17 | SLLPAIVEL |
|                                                                             | 18 | FLDGNELTL |
|                                                                             | 19 | TLWVDPYEV |
|                                                                             | 20 | ILDTGTIQL |
|                                                                             | 21 | VLFSSDFRI |
|                                                                             | 22 | RLNMFTPYI |
|                                                                             | 23 | ILMEHIHKL |
|                                                                             | 24 | QVCERIPTI |
|                                                                             | 25 | HLSTAFARV |
|                                                                             | 26 | RLPRIFCSC |
|                                                                             | 27 | SLDQSVVEL |
|                                                                             | 28 | KIFGSLAFL |
|                                                                             | 29 | LLMDCSGSI |
|                                                                             | 30 | MLGHTTMEV |
|                                                                             | 31 | LLIENVASL |
|                                                                             | 32 | MVDGTLLLL |
|                                                                             | 33 | LLGATCMFV |
|                                                                             | 34 | KLVANNTL  |
|                                                                             | 35 | RLTRFLSRV |
|                                                                             | 36 | GILGFVFTL |
|                                                                             | 37 | KLLEPVLLL |
|                                                                             | 38 | YLSGANLNL |

|                                                                                 |    |           |
|---------------------------------------------------------------------------------|----|-----------|
| <b>HLA-A*02:01<br/>(and T134K)</b><br><br><b>All Peptides<br/>Non-SYFPEITHI</b> | 39 | ILAKFLHWL |
|                                                                                 | 40 | RLAQETELV |
|                                                                                 | 41 | SLLLELEEV |
|                                                                                 | 42 | ALCRWGLLL |
|                                                                                 | 43 | FLWGPALV  |
|                                                                                 | 44 | ILFGHENRV |
|                                                                                 | 1  | ILSPHNVVT |
|                                                                                 | 2  | AMHYIRHRA |
|                                                                                 | 3  | KIFEYGFTE |
|                                                                                 | 4  | ALWEIQQVV |
|                                                                                 | 5  | FTFDNSKFV |
|                                                                                 | 6  | MMFDAMGAL |
|                                                                                 | 7  | KMVGTVQRV |
|                                                                                 | 8  | KLAEIFQPF |
|                                                                                 | 9  | VVYKEAKIK |
|                                                                                 | 10 | WLKEKHEEL |
|                                                                                 | 11 | FGKWRPVQL |
|                                                                                 | 12 | HLKRTILAL |
|                                                                                 | 13 | TMLYNKMEF |
|                                                                                 | 14 | IFRRDQIWF |
|                                                                                 | 15 | YTLNNGVAM |
|                                                                                 | 16 | GLAGGAATA |
|                                                                                 | 17 | KVRGRLAL  |
|                                                                                 | 18 | QLAFTYCQV |
|                                                                                 | 19 | WMDMWESPM |
|                                                                                 | 20 | ALEEGRKYV |
|                                                                                 | 21 | YLPEDSDIL |
|                                                                                 | 22 | ELADQLIHL |
|                                                                                 | 23 | NVWATHACV |
|                                                                                 | 24 | LLLGGTSEI |
|                                                                                 | 25 | DLYDYITRI |
|                                                                                 | 26 | FLYGWLFIL |
|                                                                                 | 27 | PLNEGIMAV |
|                                                                                 | 28 | FLFLYWPHY |
|                                                                                 | 29 | SGFGGETPV |
|                                                                                 | 30 | SILEYAKSI |
|                                                                                 | 31 | KMYEYVFKG |
|                                                                                 | 32 | SMFYGIFPS |

|                                                                                     |    |           |
|-------------------------------------------------------------------------------------|----|-----------|
|                                                                                     | 33 | WFMTWQPNI |
|                                                                                     | 34 | SLFGAAVSL |
|                                                                                     | 35 | YLLLTNGT  |
|                                                                                     | 36 | SIFFDYMAI |
|                                                                                     | 37 | YQIEGAWRA |
|                                                                                     | 38 | FQWHEAMFL |
|                                                                                     | 39 | TLKPGTMSV |
|                                                                                     | 40 | YIITCCLFA |
|                                                                                     | 41 | GLYSLPHDL |
|                                                                                     | 42 | RQPLNIQAI |
|                                                                                     | 43 | SVFSRPLPL |
|                                                                                     | 44 | GIYGAVIPL |
| <b>HLA-A*02:01<br/>Subset</b><br><br><b>EC<sub>50</sub> Pairs<br/>SYFPEITHI</b>     | 1  | HLIDYLVTS |
|                                                                                     | 2  | VLVKSPNHV |
|                                                                                     | 3  | ILDKKVEKV |
|                                                                                     | 4  | HLGNVKYLV |
|                                                                                     | 5  | RLMKQDFSV |
|                                                                                     | 6  | YMNGTMSQV |
|                                                                                     | 7  | SLLPAIVEL |
|                                                                                     | 8  | FLDGNELTL |
|                                                                                     | 9  | TLWVDPYEV |
|                                                                                     | 10 | RLNMFPTYI |
|                                                                                     | 11 | HLSTAFARV |
|                                                                                     | 12 | SLDQSVVEL |
|                                                                                     | 13 | LLIENVASL |
|                                                                                     | 14 | LLGATCMFV |
|                                                                                     | 15 | GILGFVFTL |
|                                                                                     | 16 | KLLEPVLLL |
|                                                                                     | 17 | YLSGANLNL |
|                                                                                     | 18 | ALCRWGLLL |
|                                                                                     | 19 | FLWGPRALV |
|                                                                                     | 20 | ILFGHENRV |
|                                                                                     | 21 | HLIDYLVTS |
| <b>HLA-A*02:01<br/>Subset</b><br><br><b>EC<sub>50</sub> Pairs<br/>Non-SYFPEITHI</b> | 1  | AMHYIRHRA |
|                                                                                     | 2  | FTFDNSKfV |
|                                                                                     | 3  | MMFDAMGAL |
|                                                                                     | 4  | KMVGTVQRV |
|                                                                                     | 5  | WLKEKHEEL |
|                                                                                     | 6  | GLAGGAATA |
|                                                                                     | 7  | ALEEGRKYV |
|                                                                                     | 8  | NVWATHACV |
|                                                                                     | 9  | LLLGGTSEI |
|                                                                                     | 10 | FLYGWLFIL |

|                                                                 |    |           |
|-----------------------------------------------------------------|----|-----------|
|                                                                 | 11 | PLNEGIMAV |
|                                                                 | 12 | SILEYAKSI |
|                                                                 | 13 | KMYEYVFKG |
|                                                                 | 14 | SLFGAAVSL |
|                                                                 | 15 | YLLLTNGT  |
|                                                                 | 16 | SIFFDYMAI |
|                                                                 | 17 | FQWHEAMFL |
|                                                                 | 18 | TLKPGTMSV |
|                                                                 | 19 | YIITCCLFA |
|                                                                 | 20 | GLYSLPHDL |
|                                                                 | 21 | GIYGAVIPL |
| <b>HLA-B*08:01</b><br><br><b>All Peptides<br/>SYFPEITHI</b>     | 1  | DLERKVESL |
|                                                                 | 2  | ELRSLYNTV |
|                                                                 | 3  | EIKDTKEAL |
|                                                                 | 4  | EIKDTKEAL |
|                                                                 | 5  | NLKLKLHTF |
|                                                                 | 6  | YLVKGNVF  |
|                                                                 | 7  | ELRSRYWAI |
|                                                                 | 8  | RAKFKQLL  |
|                                                                 | 9  | FLRGRAYGL |
|                                                                 | 10 | QAKWRLQTL |
|                                                                 | 11 | ELRSRYWAI |
|                                                                 | 12 | LPHNHTDL  |
| <b>HLA-B*08:01</b><br><br><b>All Peptides<br/>Non-SYFPEITHI</b> | 1  | TLRRRFAVA |
|                                                                 | 2  | FPRYPLNVL |
|                                                                 | 3  | FIKDRATAV |
|                                                                 | 4  | QLSLRMLSL |
|                                                                 | 5  | QLSLKMLSL |
|                                                                 | 6  | YRRKLTNPA |
|                                                                 | 7  | VPRPRFSAL |
|                                                                 | 8  | FARERRLAL |
|                                                                 | 9  | LAYARGQAM |
|                                                                 | 10 | YGLERLAAM |
|                                                                 | 11 | EAILRRFPL |
|                                                                 | 12 | LARLFLYAL |
|                                                                 | 13 | WLRHPVAI  |
|                                                                 | 14 | LMARRARSL |
|                                                                 | 15 | VLRRRRRDA |
|                                                                 | 16 | RLRLLKQM  |
|                                                                 | 17 | MTRRRVLSV |
|                                                                 | 18 | MEQRVMATL |
|                                                                 | 19 | EAKLFFQVI |
|                                                                 | 20 | LAARKARAA |

|                                                             |    |            |
|-------------------------------------------------------------|----|------------|
| <b>HLA-B*44:02</b><br><br><b>All Peptides SYFPEITHI</b>     | 1  | EEFGRAFSF  |
|                                                             | 2  | EEPTVIKKY  |
|                                                             | 3  | EENLLDFVRF |
|                                                             | 4  | EEKRGSLHVV |
|                                                             | 5  | KEFEDDIINW |
| <b>HLA-B*44:02</b><br><br><b>All Peptides Non-SYFPEITHI</b> | 1  | RERIRYFHY  |
|                                                             | 2  | AEHFENQVL  |
|                                                             | 3  | HEGDIVPLF  |
|                                                             | 4  | IEAGDEVFF  |
|                                                             | 5  | REWGWRIPF  |
|                                                             | 6  | LEHGLYPQL  |
|                                                             | 7  | AEALLADGL  |
|                                                             | 8  | REMGIVDLL  |
|                                                             | 9  | REIGDISYL  |
|                                                             | 10 | AELGAFFSI  |
|                                                             | 11 | YEGDLRVTF  |
|                                                             | 12 | QEGAMHTAL  |
|                                                             | 13 | SETQGTEKL  |
|                                                             | 14 | REMHHLVEF  |
|                                                             | 15 | AEIESATLF  |
|                                                             | 16 | AESICSYWL  |
|                                                             | 17 | AETESATLF  |
|                                                             | 18 | KEAVNHFHL  |
|                                                             | 19 | REGGGAVRL  |
|                                                             | 20 | REAGMAATL  |
|                                                             | 21 | IENIDFASL  |
|                                                             | 22 | CELSSHGDL  |
|                                                             | 23 | WEMRAGREI  |
|                                                             | 24 | TEMYIMYAM  |
|                                                             | 25 | GEGPGINPI  |
|                                                             | 26 | RESIVCYFM  |
| <b>HLA-B*27:05</b><br><br><b>All Peptides SYFPEITHI</b>     | 1  | ARLFGIRAK  |
|                                                             | 2  | GRIDKPILK  |
|                                                             | 3  | GRNSFEVRV  |
|                                                             | 4  | IRHNKDRKV  |
|                                                             | 5  | RRFFPYVYV  |
| <b>HLA-B*27:05</b><br><br><b>All Peptides Non-SYFPEITHI</b> | 1  | NRRFVNVVP  |
|                                                             | 2  | RRVFHGVAK  |
|                                                             | 3  | SRLTYQWHK  |
|                                                             | 4  | RRFGGTVIR  |
|                                                             | 5  | RQWAQDLTL  |
|                                                             | 6  | RRTAAGIMK  |
|                                                             | 7  | RRWCFDGPR  |

|  |    |           |
|--|----|-----------|
|  | 8  | KRWGFRSGV |
|  | 9  | RRLHRLLLM |
|  | 10 | RRWKLLSSC |
|  | 11 | SREGMFLPK |
|  | 12 | RREGGGAVR |
|  | 13 | KRLGDVISV |
|  | 14 | KRYKNRVAS |
|  | 15 | FRQCTGRPK |
|  | 16 | RRRVLSVVV |
|  | 17 | SRIELGRGY |
|  | 18 | WRMGYRTHN |
|  | 19 | GRVTVSTKR |

**Supporting Information Table 2**

|             |         |       |
|-------------|---------|-------|
| A0201/T134K | 0.0770  | ( )   |
| A0201/B0801 | 0.0253  | (*)   |
| A0201/B4402 | <0.0001 | (***) |
| A0201/B2705 | 0.0576  | ( )   |
| T134K/B0801 | <0.0001 | (***) |
| T134K/B4402 | <0.0001 | (***) |
| T134K/B2705 | <0.0001 | (***) |
| B0801/B4402 | 0.0499  | (*)   |
| B0801/B2705 | 0.7539  | ( )   |
| B4402/B2705 | 0.0260  | (*)   |

# Supporting Information Figure 1

## Non-SYFPEITHI Peptides

## SYFPEITHI Peptides

A\*02:01

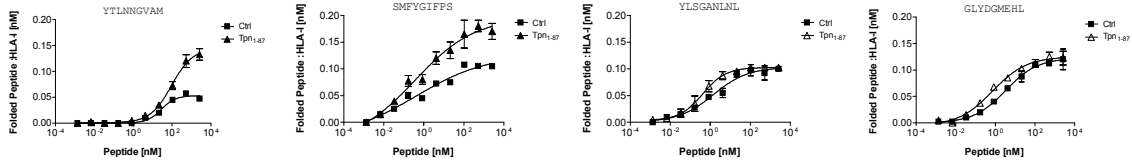

A\*02:01-T134K

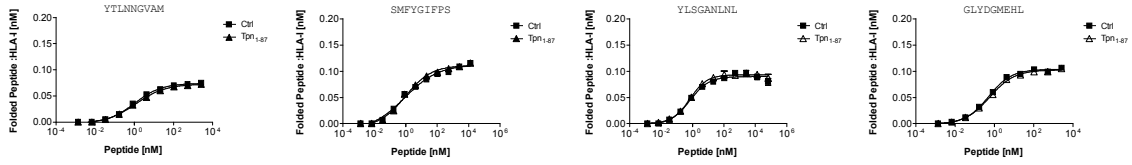

B\*08:01

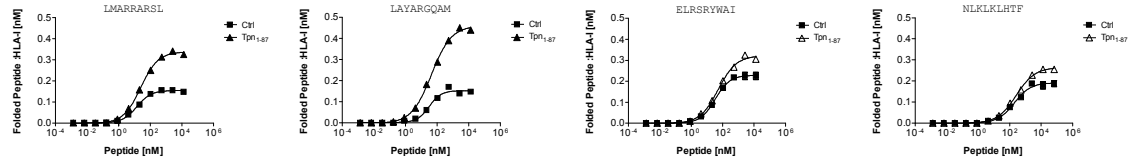

B\*44:02

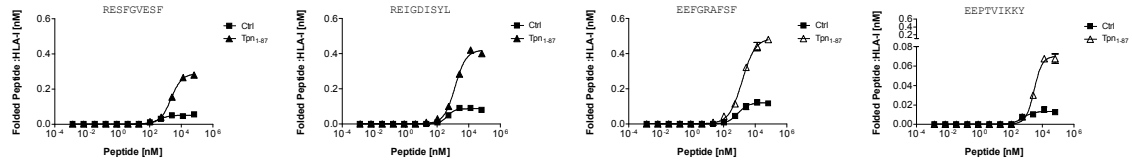

B\*27:05

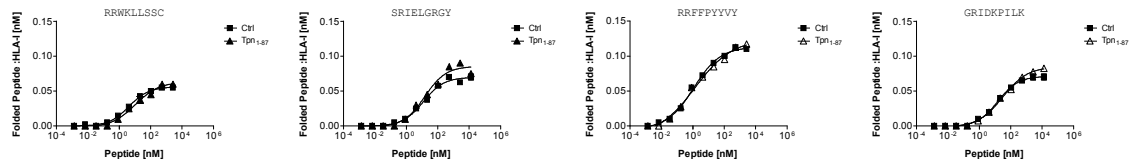

## **Supporting Information Figure 1**

*Tpn<sub>1-87</sub> differentially facilitates folding of peptide-HLA-I complexes.*

Fixed concentrations of  $\beta_2m$  and HLA-I heavy chains were mixed with titrated concentrations of peptide in the presence or absence of Tpn<sub>1-87</sub>. The mixtures were incubated at 18 °C for 48 hrs, and folded peptide-HLA-I complexes were detected by the W6/32 monoclonal antibody in a homogenous assay (Harndahl et al, 2009).

# Supporting Information Figure 2

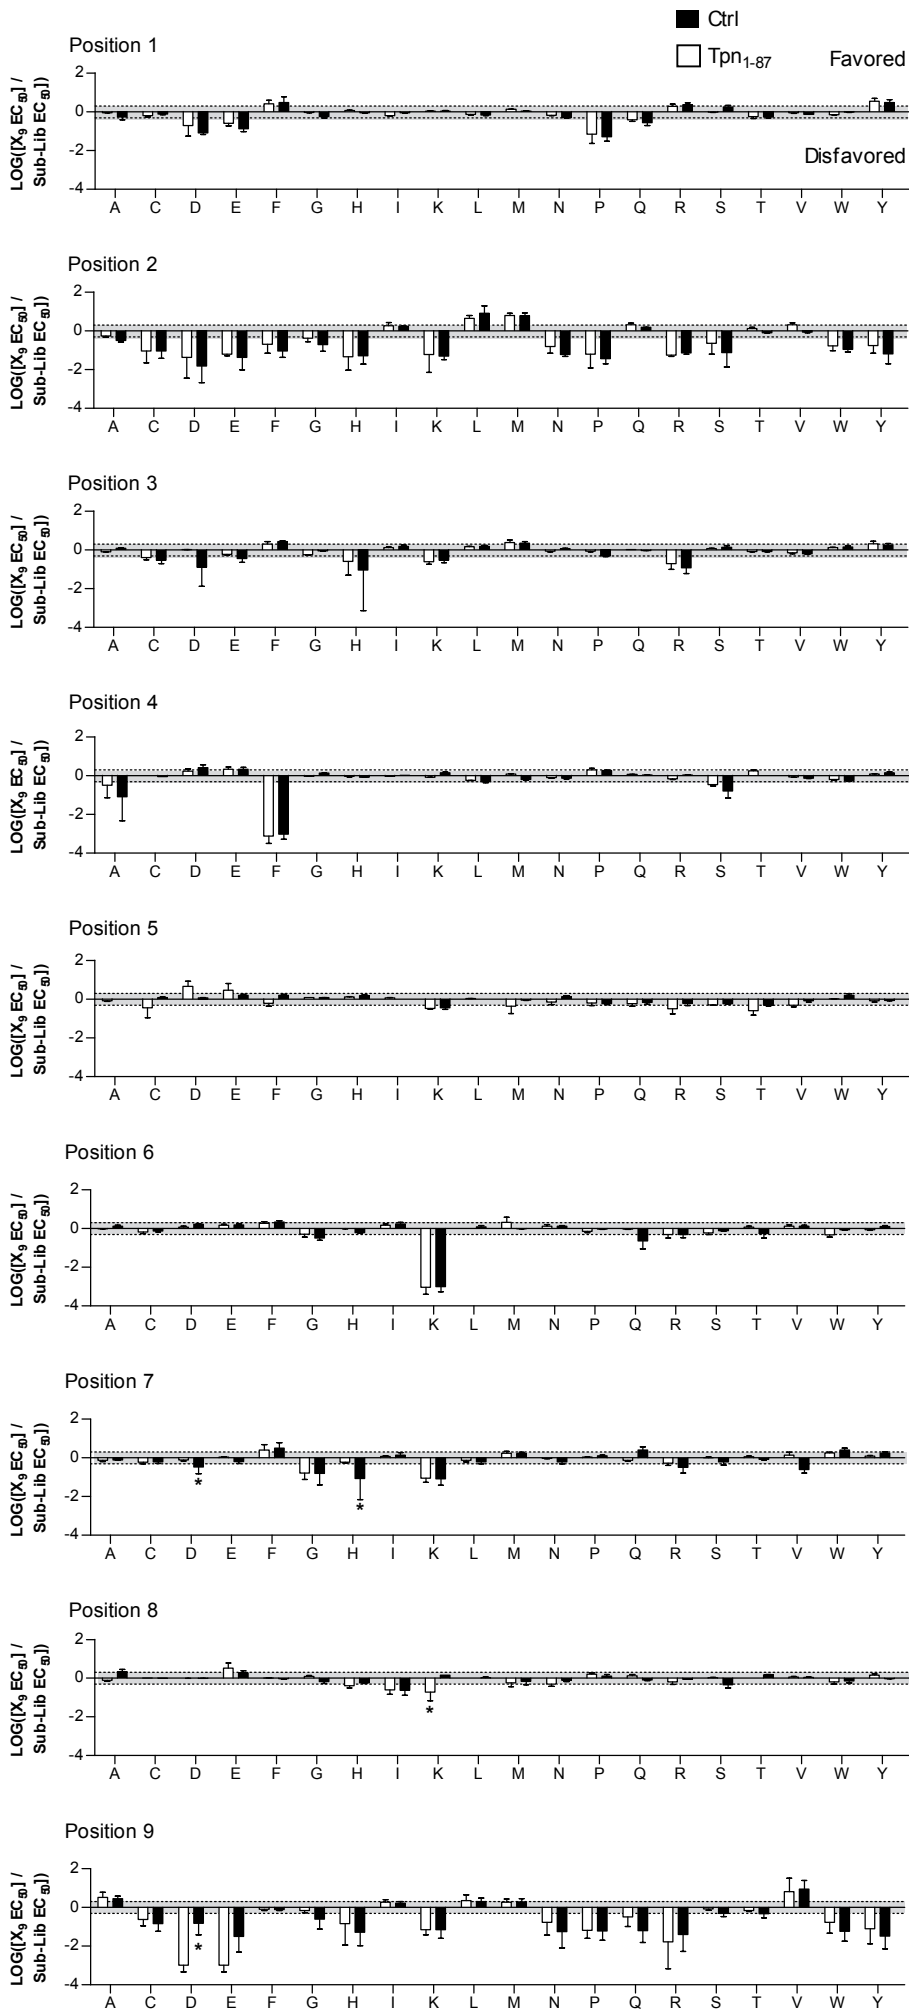

## Supporting Information Figure 2

*Tpn<sub>1-87</sub> does not grossly alter the peptide binding specificity of HLA-A\*02:01; a complete amino acid substitution scan across the entire peptide.*

Fixed concentrations of  $\beta_2$ -microglobulin and HLA-A\*02:01 heavy chain were mixed with titrated concentrations of each 9-mer peptide sub-library in the presence or absence of Tpn<sub>1-87</sub>. The mixture was incubated at 18 °C for 48 hrs, and subsequently folded peptide-HLA-A\*02:01 complexes were measured in a biochemical assay. Each sub-library has one amino acid fixed in a position in the 9-mer peptide, and thus for a 9-mer peptide library there are 180 different sub-libraries and a library containing random amino acids at all positions (X<sub>9</sub>). Relative binding (RB) values were calculated as the ratio between the affinity for the X<sub>9</sub> library and the affinity of each sub-library. The RB values were normalized to the total sum of 20 for each position in the peptide, and the log values of the normalized RB values are shown along the y-axis. The amino acid substitutions are shown along the x-axis. Each experiment was done four times, and the average and standard deviations are shown in the graph. Significant differences between RB values in the presence and absence of Tpn<sub>1-87</sub> were determined by unpaired t tests, and are marked with an asterisk. Only differences between RB values outside the grey area are marked, since only these are relevant for the peptide binding specificity.



# Supporting Information Figure 3

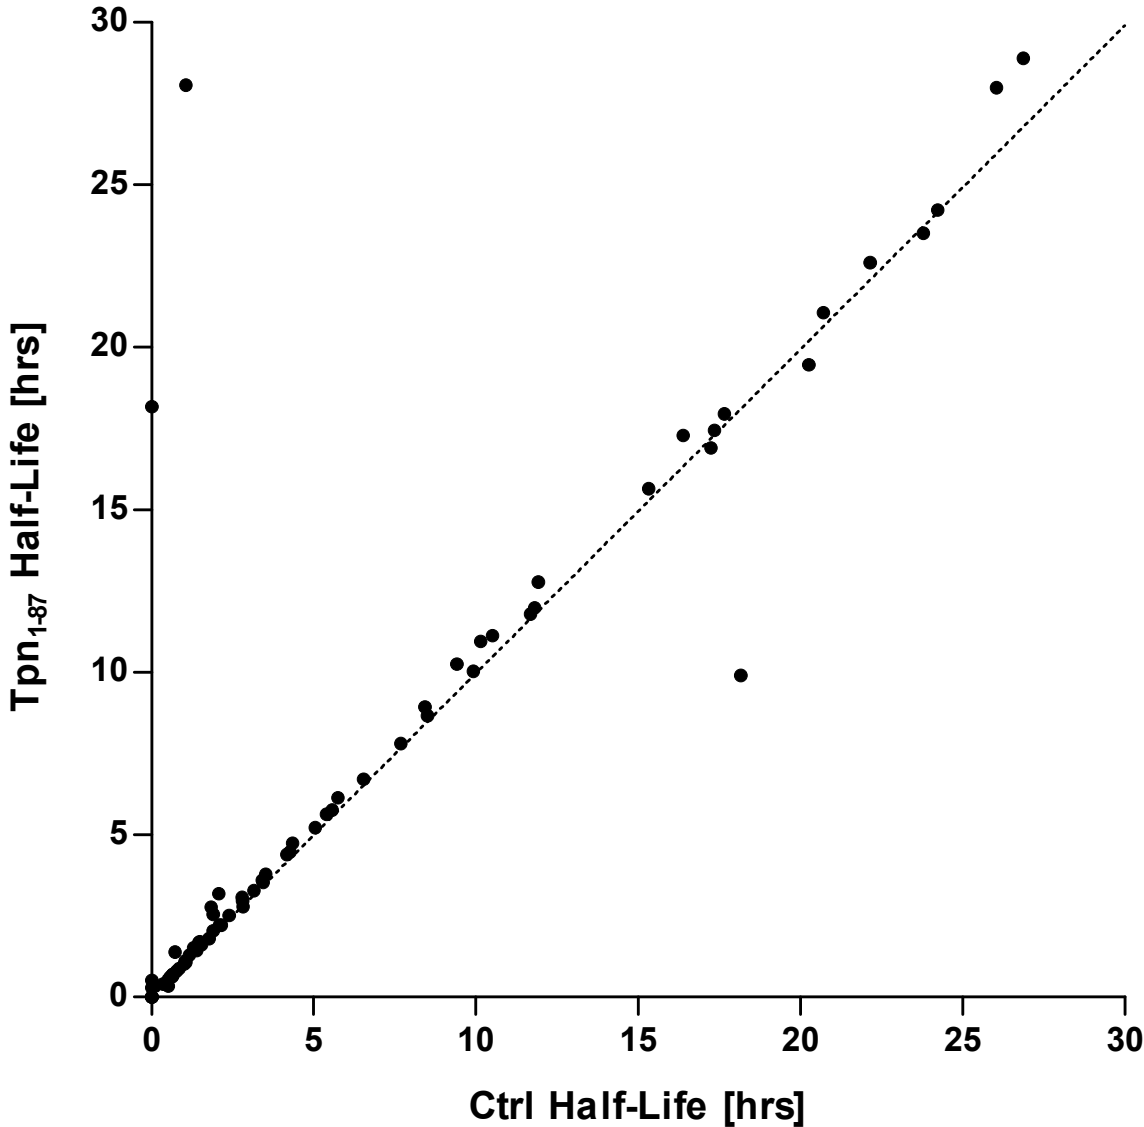

### **Supporting Information Figure 3**

*Tpn<sub>1-87</sub> does not alter the stability of the peptide-HLA-A\*02:01 complex.*

Peptide and HLA-A\*02:01 heavy chain in the absence (Ctrl) or presence (Tpn<sub>1-87</sub>) of Tpn<sub>1-87</sub> were incubated with <sup>125</sup>I labeled β<sub>2</sub>-microglobulin. After 18 hrs of incubation at 18 °C, an excess amount of cold β<sub>2</sub>-microglobulin was added, and the reaction was incubated at 37 °C, and read at regular intervals. The stabilities of the peptide-HLA-I complexes were calculated as half-lives from the read-out using one-phase dissociation kinetics.

# Supporting Information Figure 4

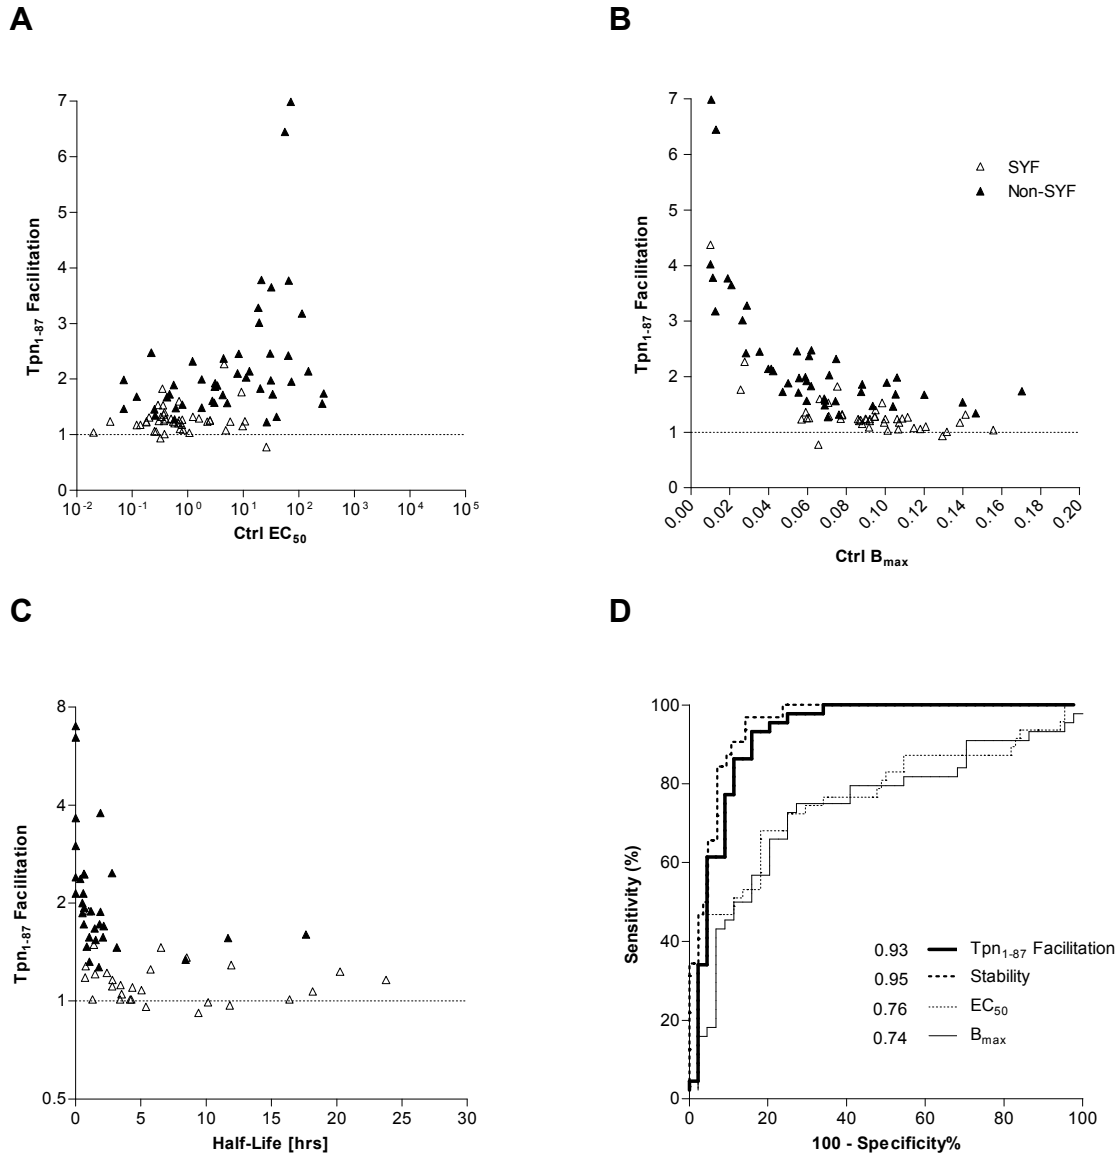

#### **Supporting Information Figure 4**

*Tpn<sub>1-87</sub> facilitates folding of peptide-HLA-A\*02:01 complexes, and the facilitation inversely correlates with the intrinsic stability of the peptide-HLA-A\*02:01 complex.*

The Tpn<sub>1-87</sub> facilitation was analyzed using the same set of peptides tested on HLA-A\*02:01 in Fig. 1. **(A)** The Tpn<sub>1-87</sub> facilitation was plotted against Ctrl EC<sub>50</sub>, the affinity measured in the absence of Tpn<sub>1-87</sub>. **(B)** The Tpn<sub>1-87</sub> facilitation was plotted against the Ctrl B<sub>max</sub>, the saturation plateau measured in the absence of Tpn<sub>1-87</sub>. **(C)** The Tpn<sub>1-87</sub> facilitation was plotted against the intrinsic stability of the peptide-HLA-A\*02:01 complex. **(D)** A ROC analysis was used on all four parameters (EC<sub>50</sub>, B<sub>max</sub>, stability and Tpn<sub>1-87</sub> facilitation) to determine which parameter best correlates with the folding facilitation. To determine whether significant differences exist between the areas under the ROC curves a jack-knife analysis was performed on the ROC areas. A student's t test was used to determine statistical significant differences between the parameters tested.

# Supporting Information Figure 5

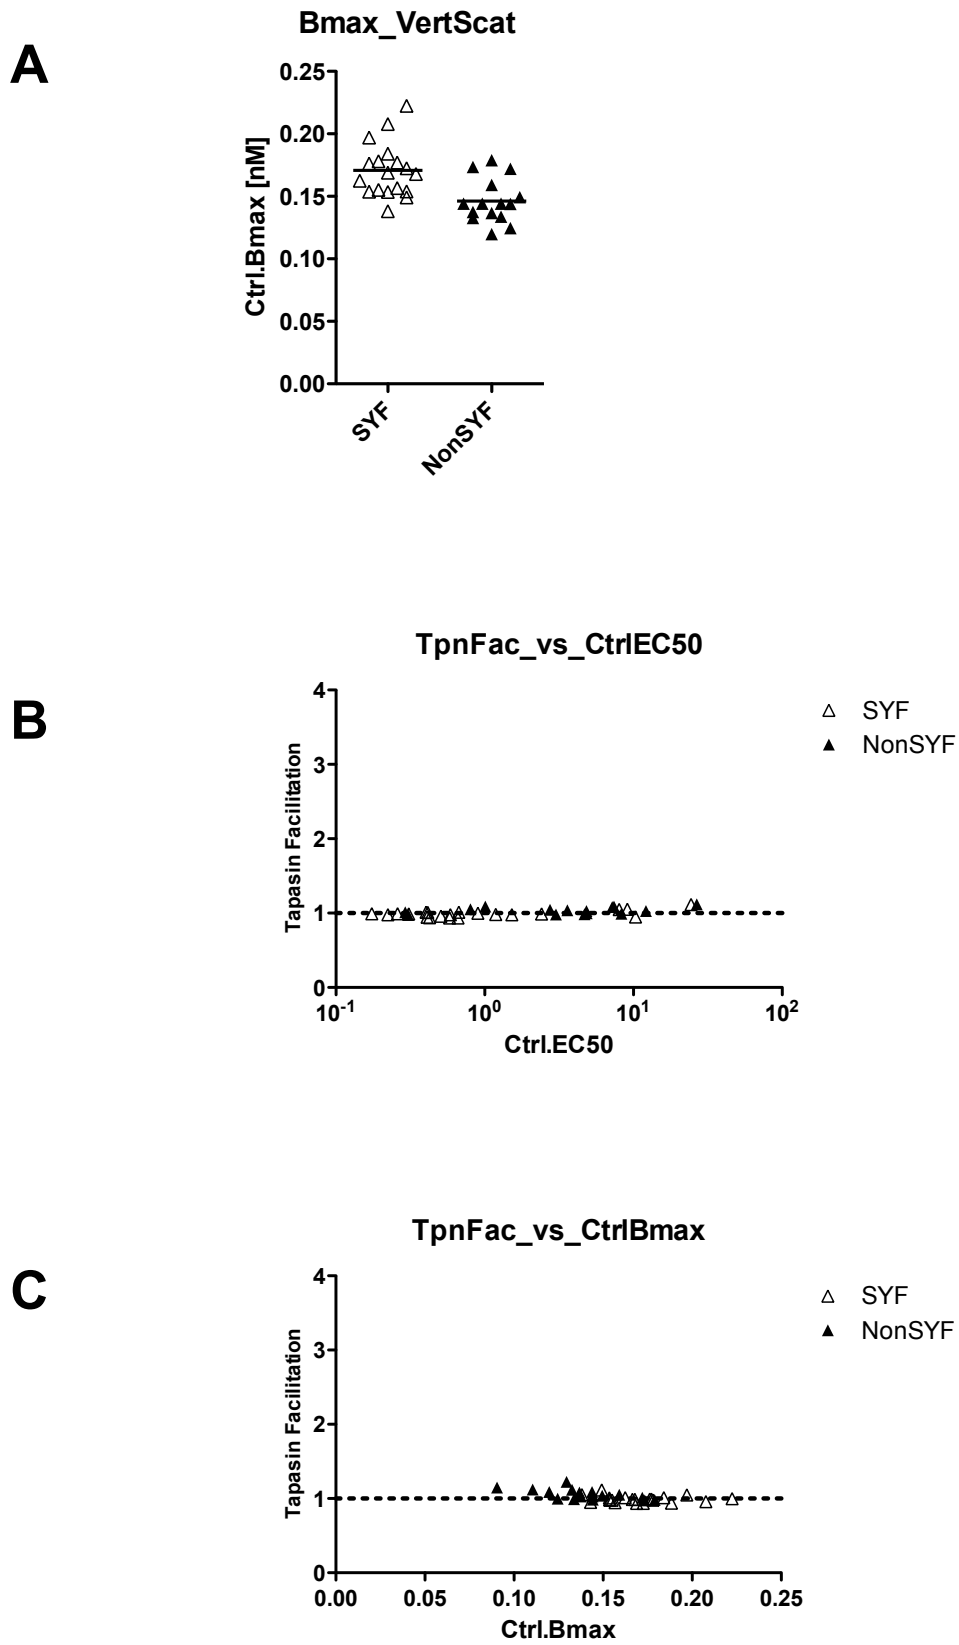

### **Supporting Information Figure 5**

*Tpn<sub>1-87</sub> does not facilitate folding of HLA-A\*02:01-T134K.*

Twenty-one SYFPEITHI and 21 non-SYFPEITHI peptides were paired, based upon affinity to HLA-A\*02:01. Fixed concentrations of  $\beta_2m$  and HLA-A\*02:01-T134K HC were mixed with various concentrations of peptide in the presence or absence of Tpn<sub>1-87</sub>. **(A)** The  $B_{max}$  values for the SYFPEITHI and non-SYFPEITHI peptides in the absence of Tpn<sub>1-87</sub> were plotted in a vertical scatter diagram. **(B)** The peptide affinities ( $EC_{50}$ ) to the HLA-I molecules were calculated as the peptide concentration required to reach the half-saturation point on the sigmoidal dose-response curve. The Tpn<sub>1-87</sub> facilitation was plotted against  $EC_{50}$ . **(C)** The Tpn<sub>1-87</sub> facilitation was plotted against the saturation plateau,  $B_{max}$ .

### Supporting Information Table 3

| SYFPEITHI peptides |            |            |            | Non-SYFPEITHI peptides |            |            |            |
|--------------------|------------|------------|------------|------------------------|------------|------------|------------|
| Batch Number       | Sequence   | Pos 2      | C-term     | Batch Number           | Sequence   | Pos 2      | C-term     |
| 4179               | YLEPGPVTA  | L          | A          | 6411                   | ILSPHNVVT  | L          | T          |
| 4183               | YLNKIQNSL  | L          | L          | 6436                   | AMHYIRHRA  | M          | A          |
| 4184               | ALSNLVVKL  | L          | L          | 6438                   | KIFEYGFTE  | I          | F          |
| 4185               | KVAELVHFL  | V          | L          | 6945                   | ALWEIQQVV  | L          | V          |
| 4186               | TLNAWVKVV  | L          | V          | 8711                   | FTFDNSKFEV | T          | V          |
| 4187               | SLSRFSWGA  | L          | A          | 8712                   | MMFDAMGAL  | M          | L          |
| 4189               | FLWGPPrAYA | L          | A          | 8718                   | KMVGTVQRV  | M          | V          |
| 4190               | ALFDGDPHL  | L          | L          | 9585                   | KLAEIFQPF  | L          | F          |
| 4193               | HLIDYLVTS  | L          | S          | 9929                   | VVYKEAKIK  | V          | K          |
| 4194               | VLVKSPNHV  | L          | V          | 10042                  | WLKEKHEEL  | L          | L          |
| 4196               | ILDKKVEKV  | L          | V          | 10051                  | FGKWRPVQL  | G          | L          |
| 4197               | HLGNVKYLV  | L          | V          | 10055                  | HLKRTILAL  | L          | L          |
| 4198               | GLHCYEQLV  | L          | V          | 10179                  | TMLYNKMEF  | M          | F          |
| 4199               | GLYDGM EHL | L          | L          | 10570                  | IFRRDQIWF  | F          | F          |
| 4200               | RLMKQDFSV  | L          | V          | 10621                  | YTLNNGVAM  | T          | M          |
| 4201               | YMNQTMSQV  | M          | V          | 10851                  | GLAGGAATA  | L          | A          |
| 4202               | SLLPAIVEL  | L          | L          | 10886                  | KVRGRLLAL  | V          | L          |
| 4203               | FLDGNELTL  | L          | L          | 11076                  | QLAFTYCQV  | L          | V          |
| 4204               | TLWVDPYEV  | L          | V          | 11083                  | WMDMWESPM  | M          | M          |
| 4205               | ILDGTIQL   | L          | L          | 11091                  | ALEEGRKYV  | L          | V          |
| 4207               | VLFSSDFRI  | L          | I          | 11250                  | YLPEDSDIL  | L          | L          |
| 4211               | RLNMFTPYI  | L          | I          | 11503                  | ELADQLIHL  | L          | L          |
| 4213               | ILMEHIHKL  | L          | L          | 11514                  | NVWATHACV  | V          | V          |
| 4216               | QVCERIPTI  | V          | I          | 11689                  | LLGGTSEI   | L          | I          |
| 4217               | HLSTAFARV  | L          | V          | 11866                  | DLYDYITRI  | L          | I          |
| 4220               | RLPRIFCSC  | L          | C          | 13533                  | FLYGWLFIL  | L          | L          |
| 4221               | SLDQSVVEL  | L          | L          | 14600                  | PLNEGIMAV  | L          | V          |
| 4223               | KIFGSLAFL  | I          | L          | 16321                  | RSLYNTVAVL | S          | L          |
| 4224               | LLMDCSGSI  | L          | I          | 16556                  | SGFGGETPV  | G          | V          |
| 4226               | MLGTHTEV   | L          | V          | 16682                  | SILEYAKSI  | I          | I          |
| 4227               | LLIENVASL  | L          | L          | 16683                  | KMYEYVFKG  | M          | G          |
| 4228               | MVDGTL LLL | V          | L          | 16782                  | RSLYNTIATL | S          | L          |
| 4229               | LLGATCMFV  | L          | V          | 16784                  | RSLFNTVAVL | S          | L          |
| 4231               | KLVANNTRL  | L          | L          | 17803                  | SLFGAAVSL  | L          | L          |
| 4232               | RLTRFLSRV  | L          | V          | 17917                  | YLLLTNGT   | L          | T          |
| 4233               | GILGFVFTL  | I          | L          | 17920                  | SIFFDYMAI  | I          | I          |
| 4234               | KLLEPV LLL | L          | L          | 18458                  | YQIEGAWRA  | Q          | A          |
| 4235               | YLSGANLNL  | L          | L          | 18475                  | FQWHEAMFL  | Q          | L          |
| 4239               | ILAKFLHWL  | L          | L          | 18928                  | TLKPGTMSV  | L          | V          |
| 4244               | RLLQETELV  | L          | V          | 18949                  | YIITCCLFA  | I          | A          |
| 4245               | SLLLELEEV  | L          | V          | 20123                  | GLYSLPHDL  | L          | L          |
| 4251               | ALCRWG LLL | L          | L          | 20126                  | RQPLNIQAI  | Q          | I          |
| 4253               | FLWGPRALV  | L          | V          | 20139                  | SVFSRPLPL  | V          | L          |
| 4254               | ILFGHENRV  | L          | V          | 20142                  | GIYGA VIPL | I          | L          |
|                    |            |            |            | 20154                  | FLFLYWPHY  | L          | Y          |
|                    |            |            |            | 20163                  | SMFYGIFPS  | M          | S          |
|                    |            |            |            | 20165                  | WFMTWQPNI  | F          | I          |
| Suboptimal anchors |            | 5          | 5          | Suboptimal anchors     |            | 21         | 16         |
|                    |            | 44         | 44         |                        |            | 47         | 47         |
|                    |            | <b>11%</b> | <b>11%</b> |                        |            | <b>45%</b> | <b>34%</b> |
